# Supplementary material for: Sex-related differences in the association between frailty and dietary consumption in Japanese older people: a cross-sectional study
Source: PubMed Central journal article supplement (PMC6683375; doi:10.1186/s12877-019-1229-5), 2019-08-05

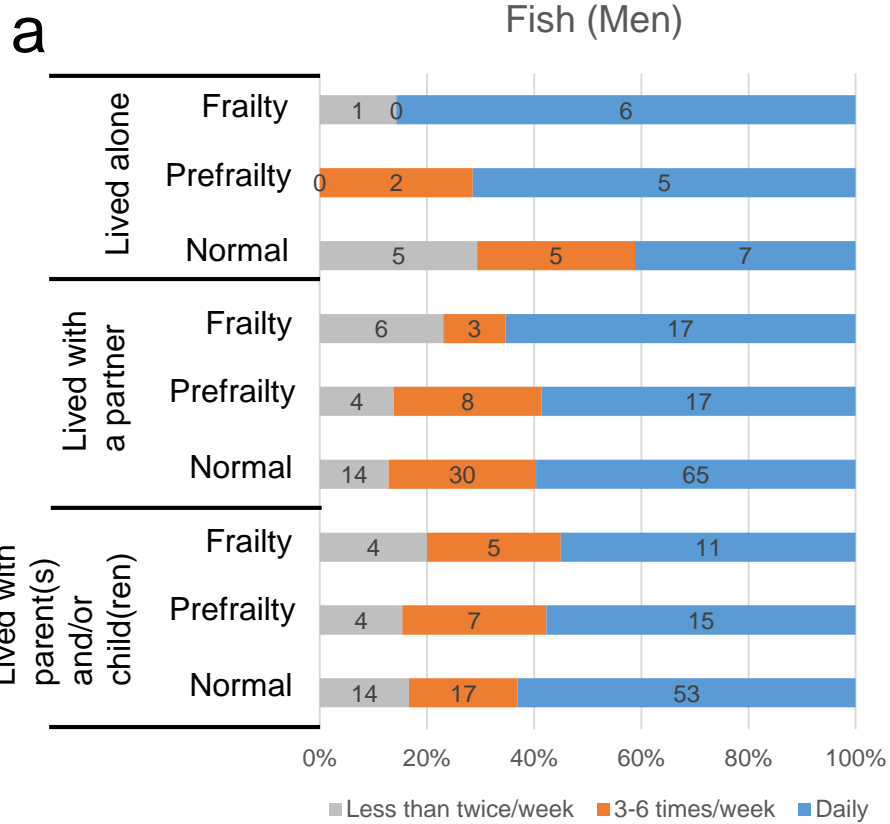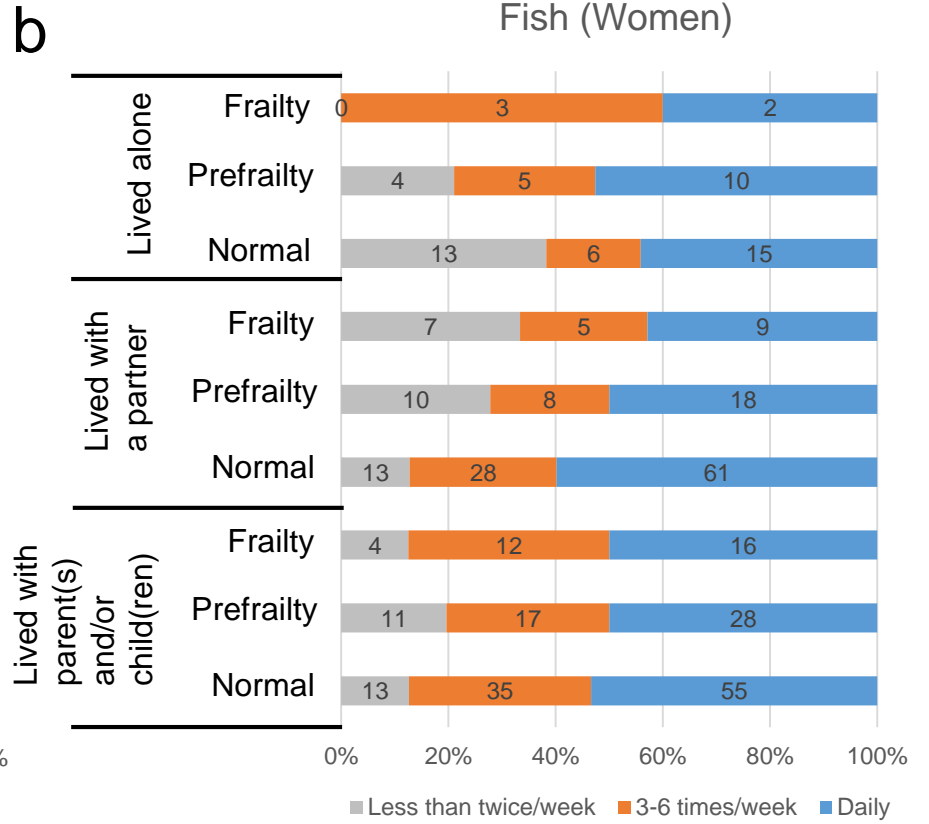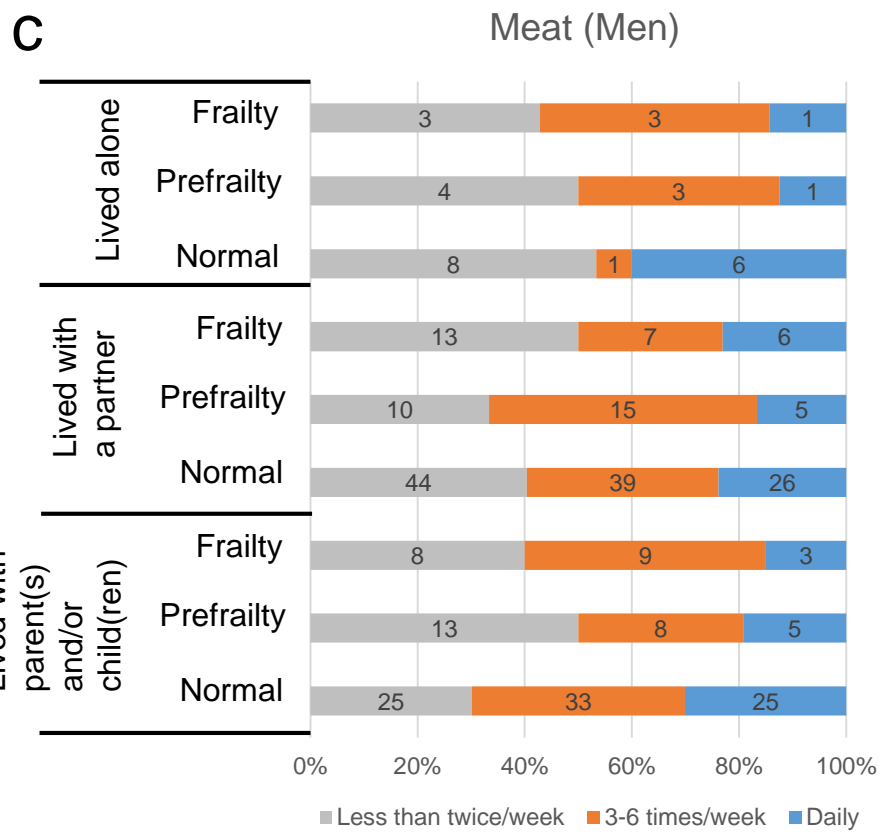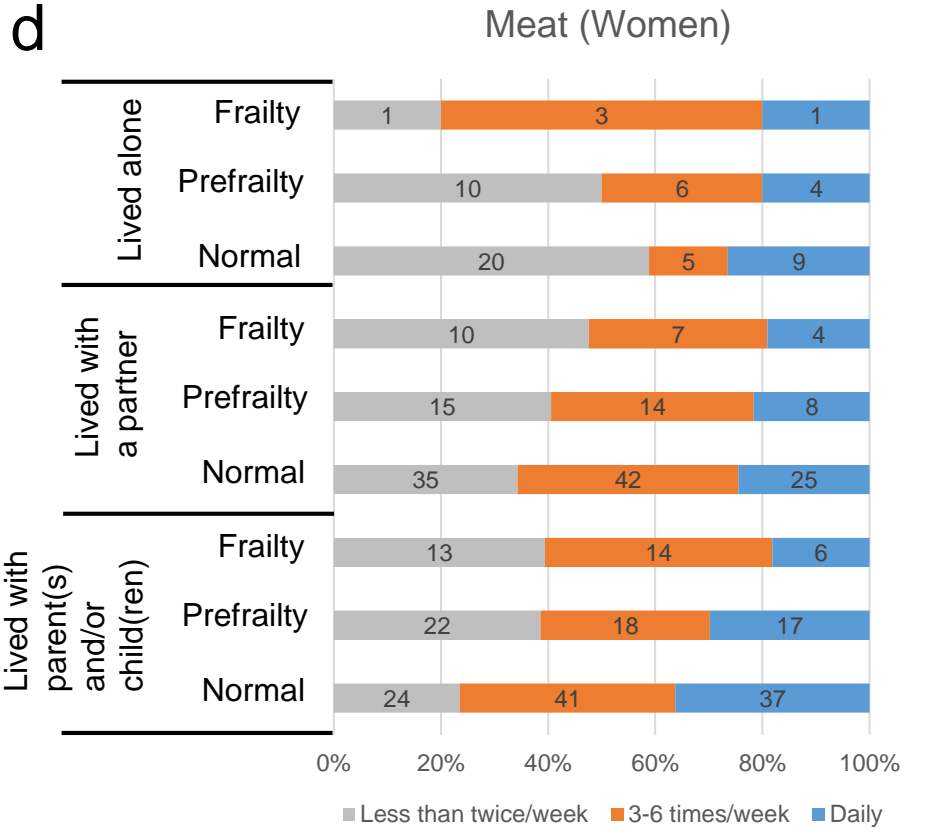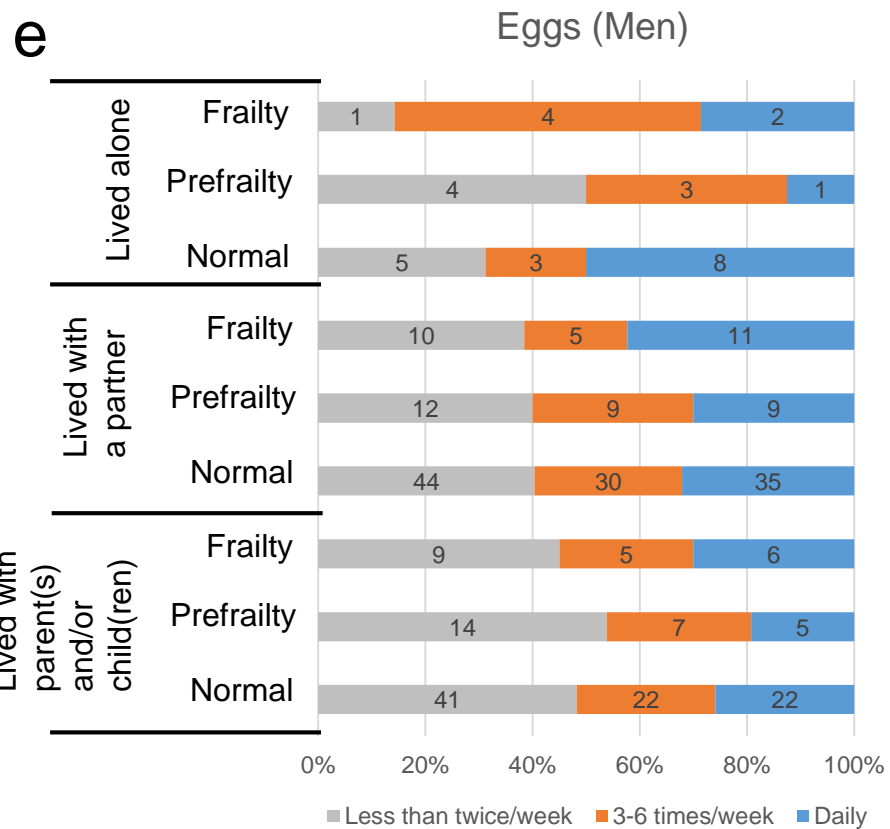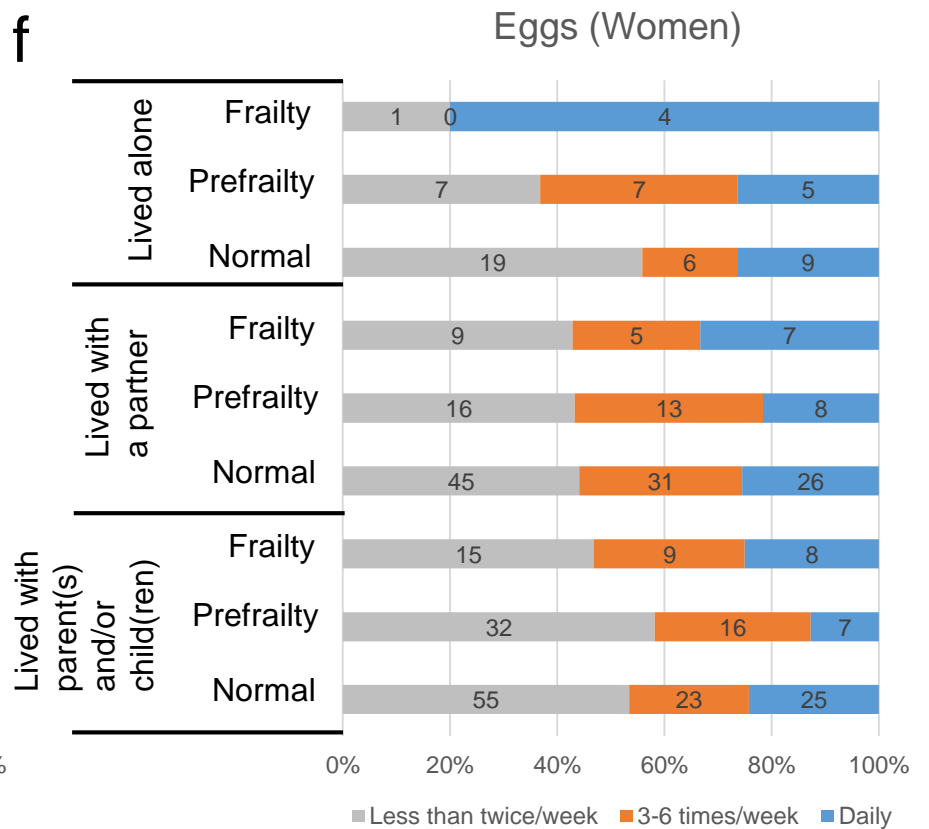

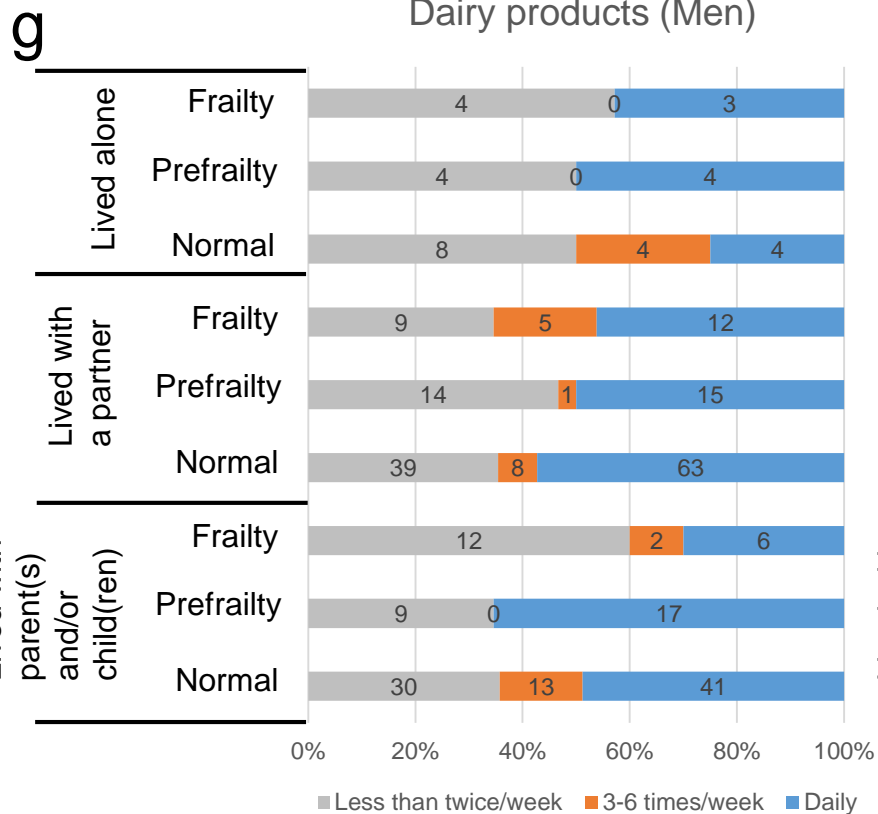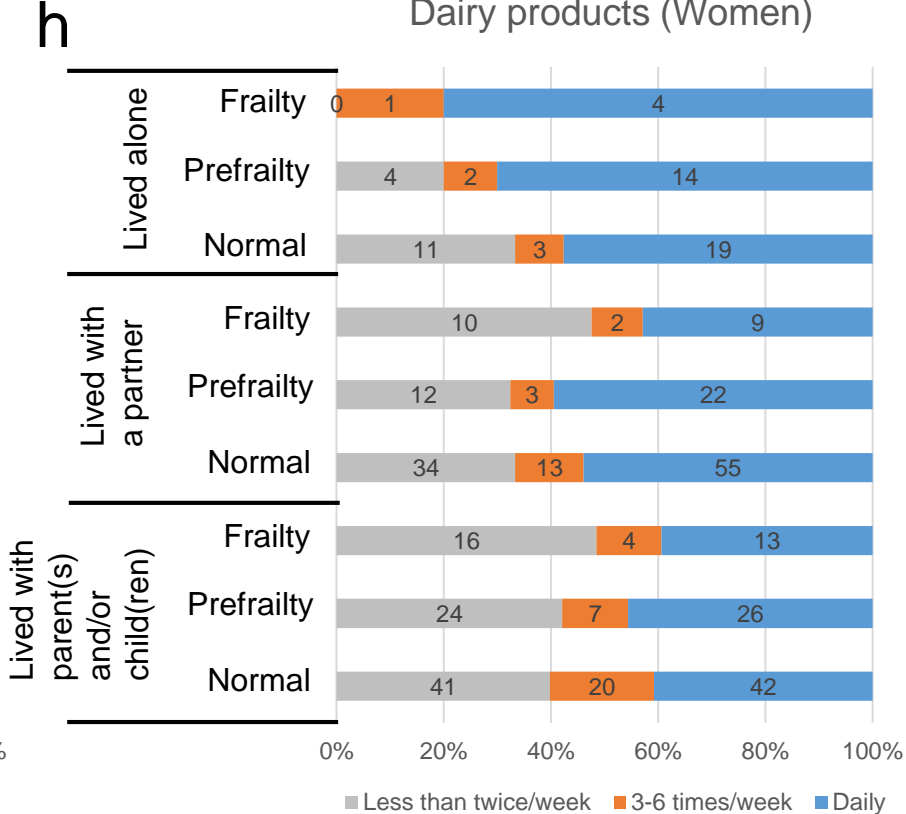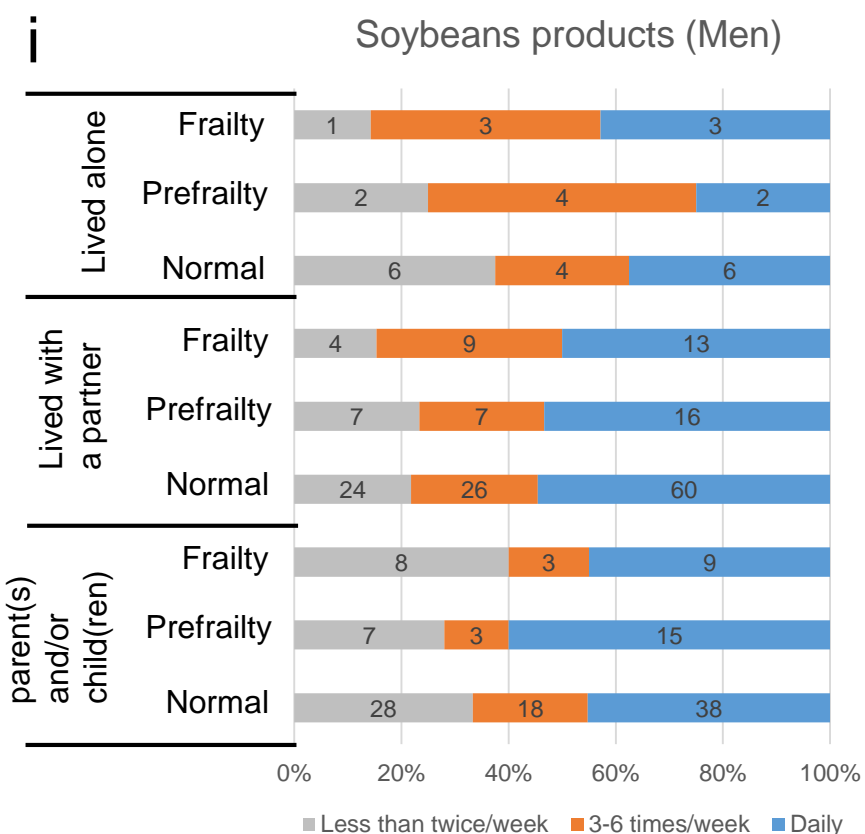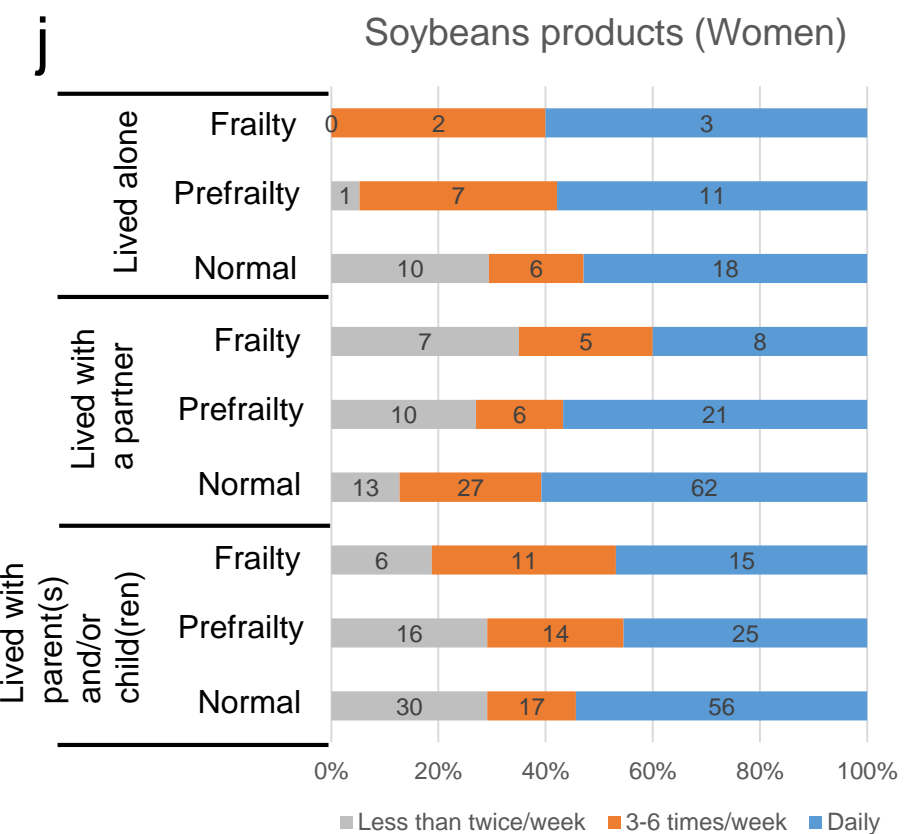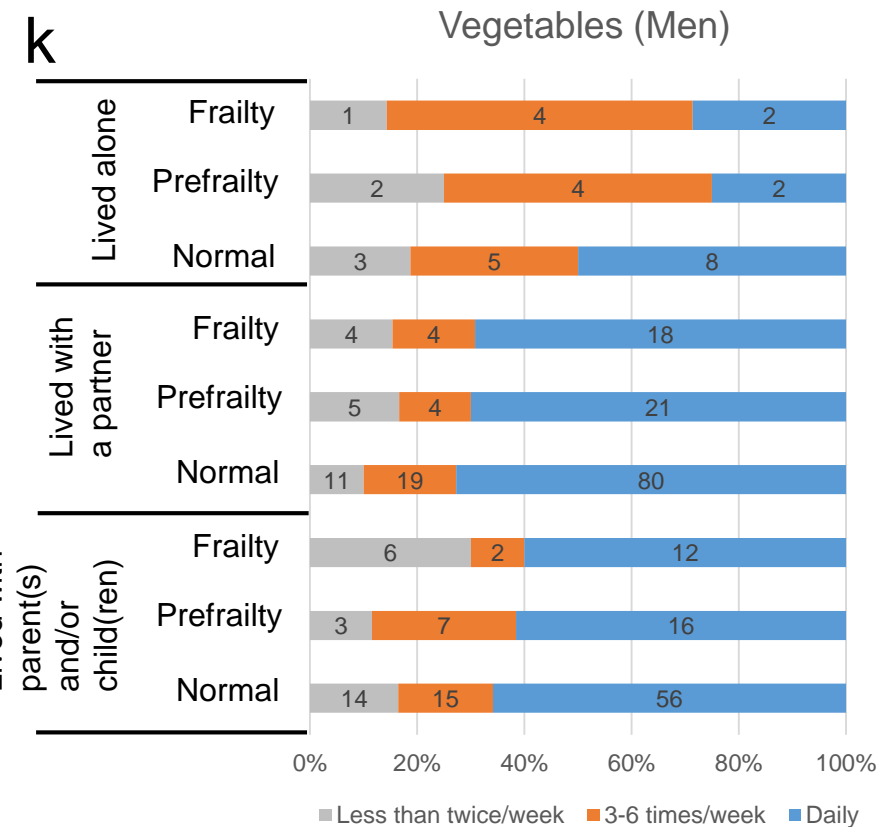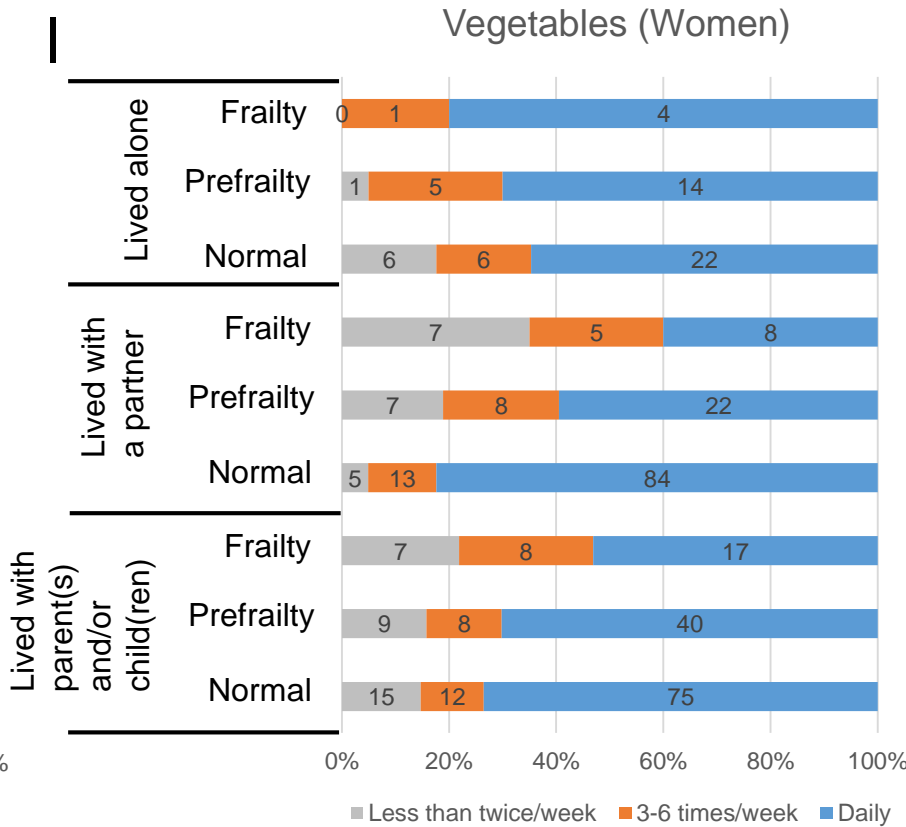

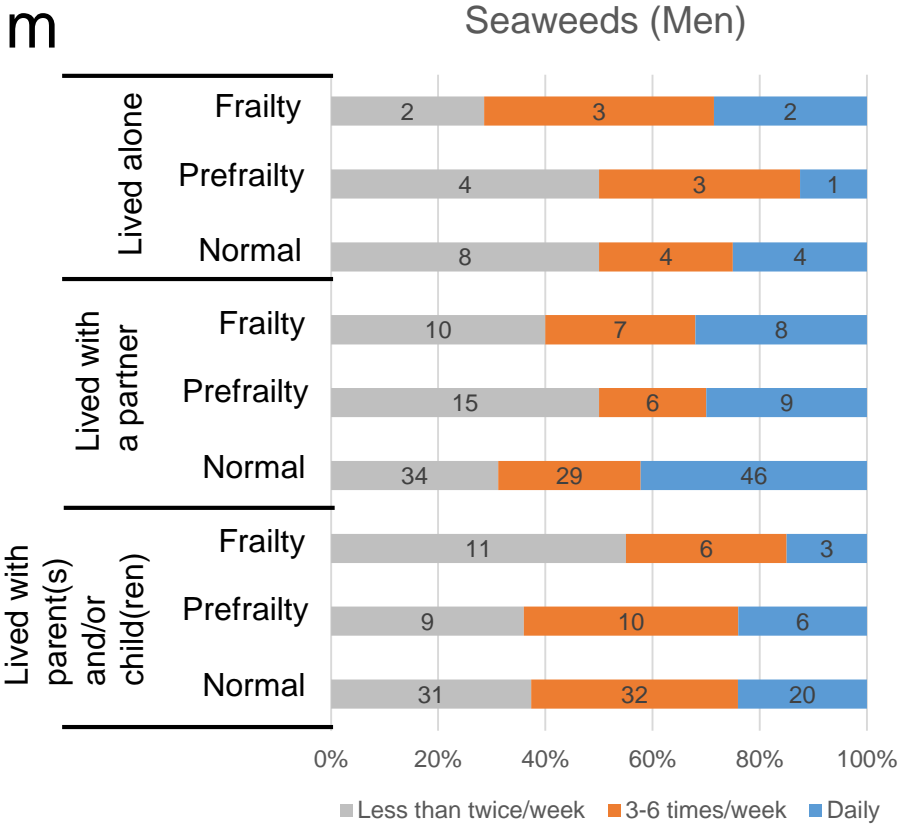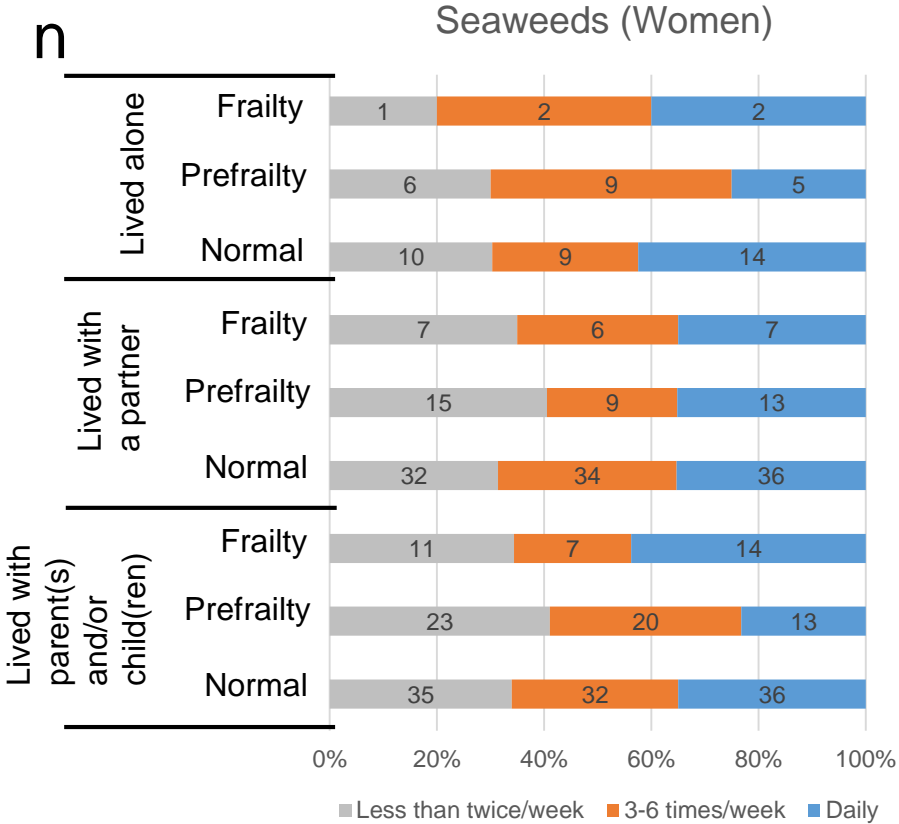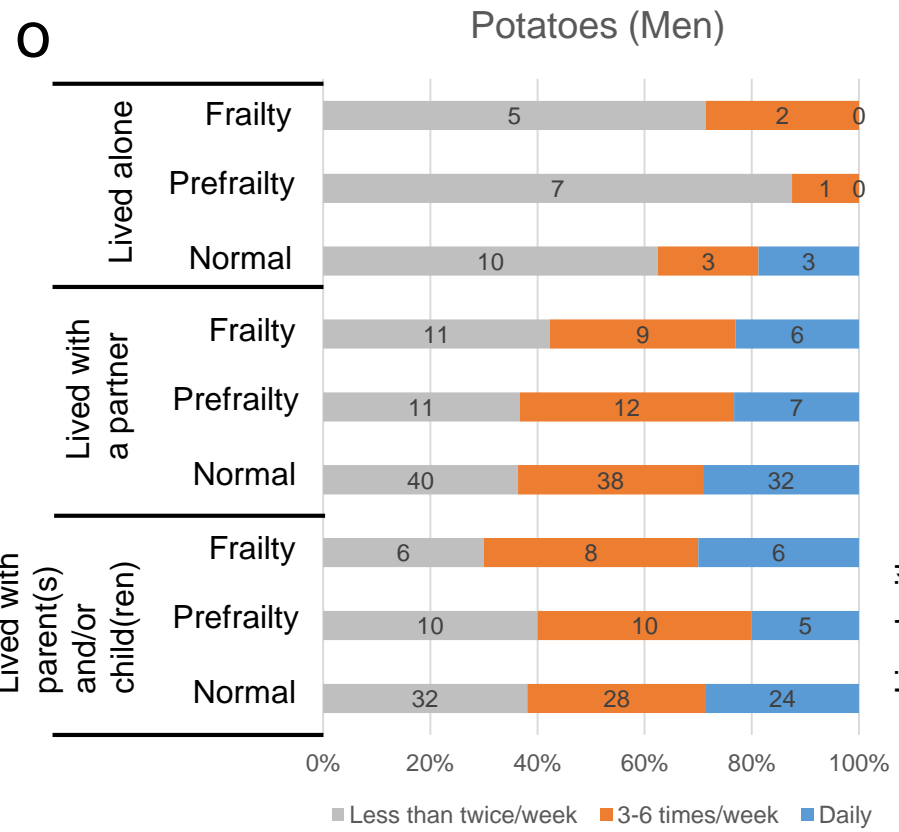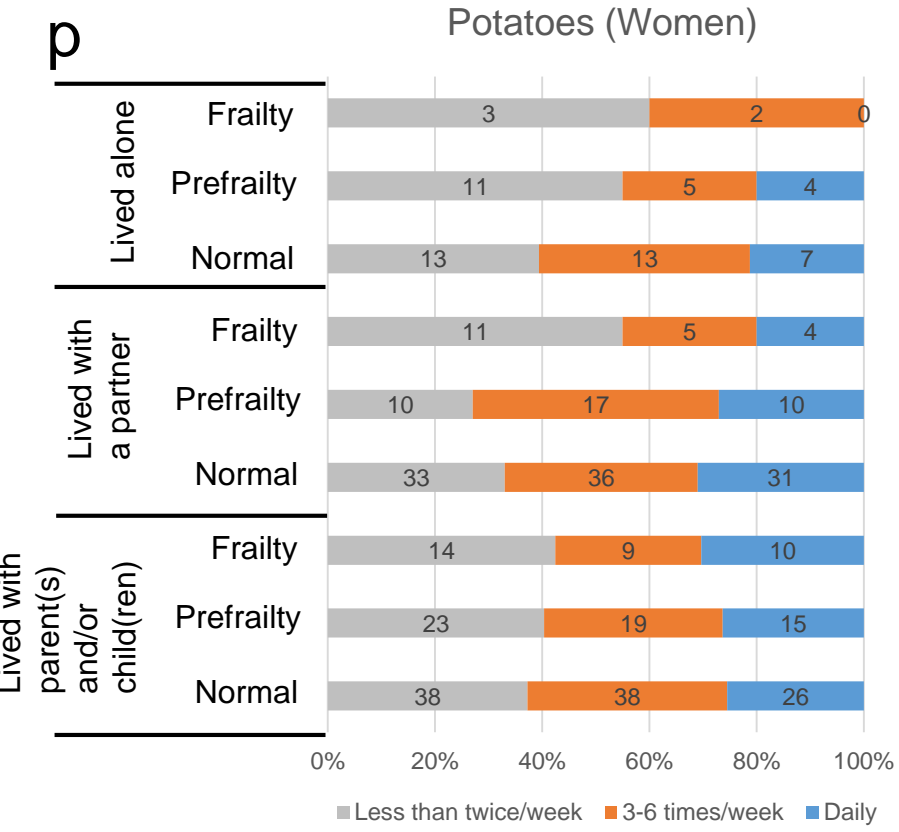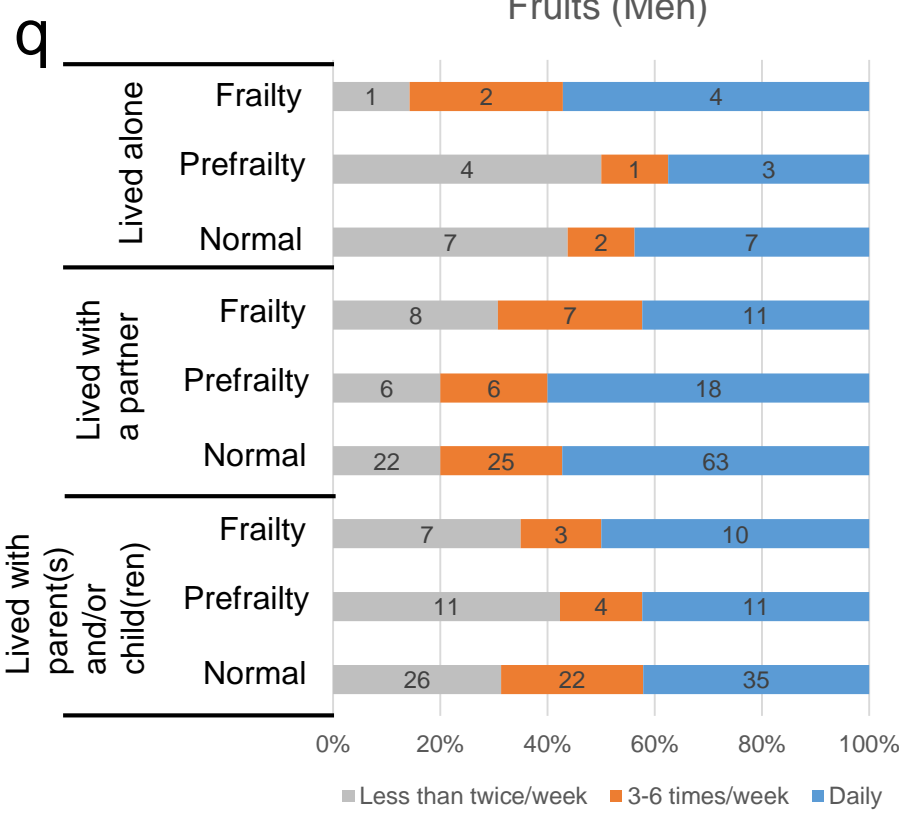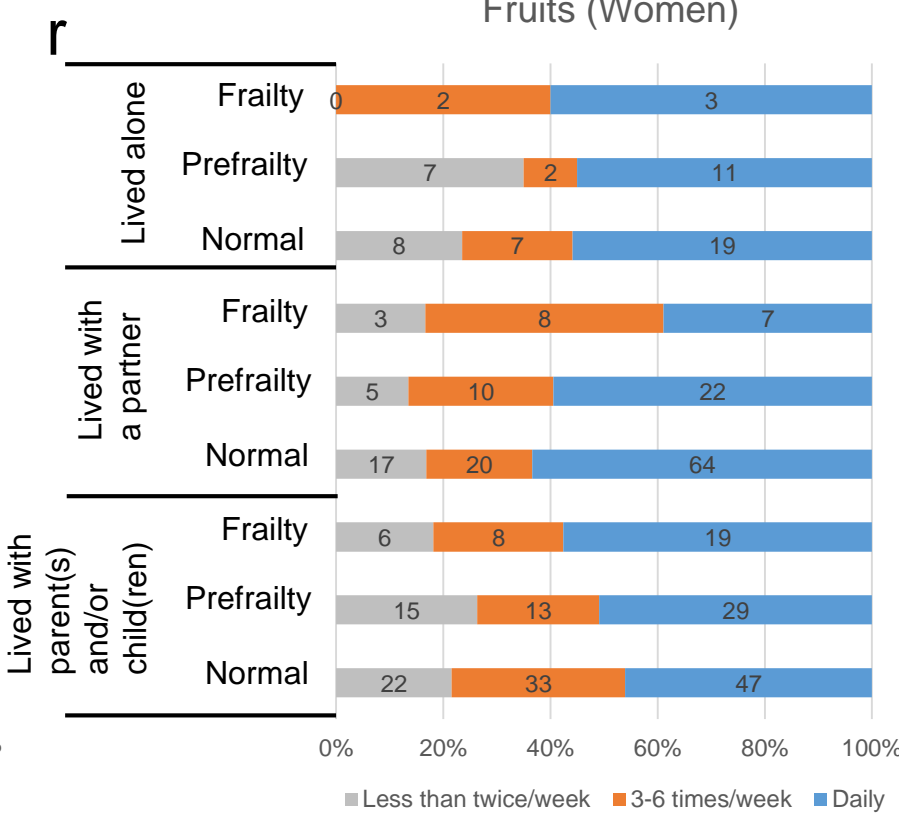

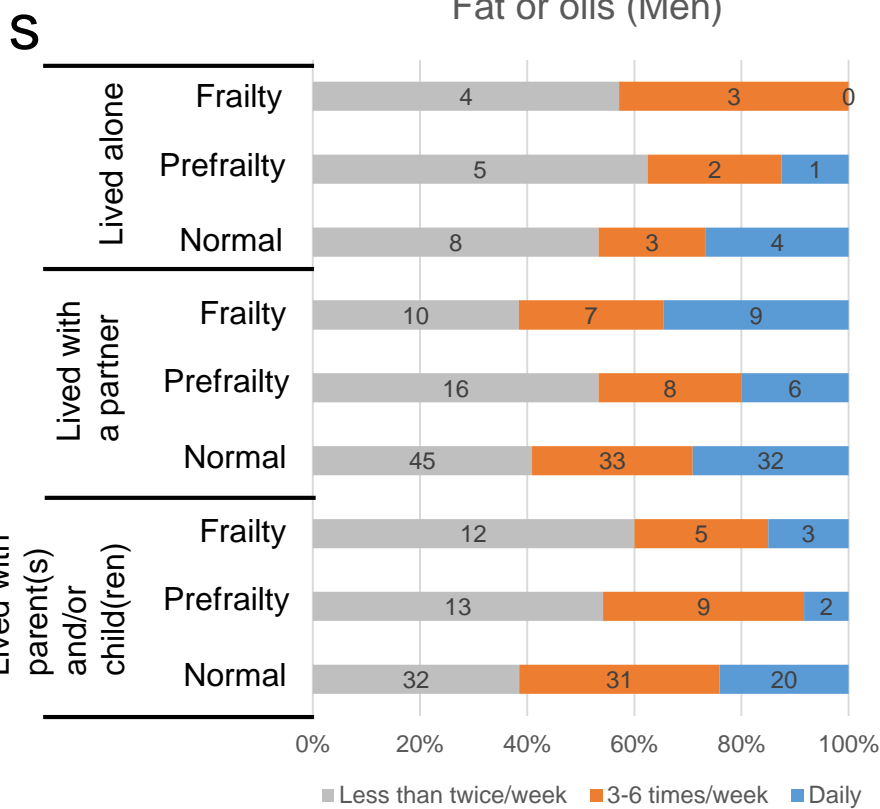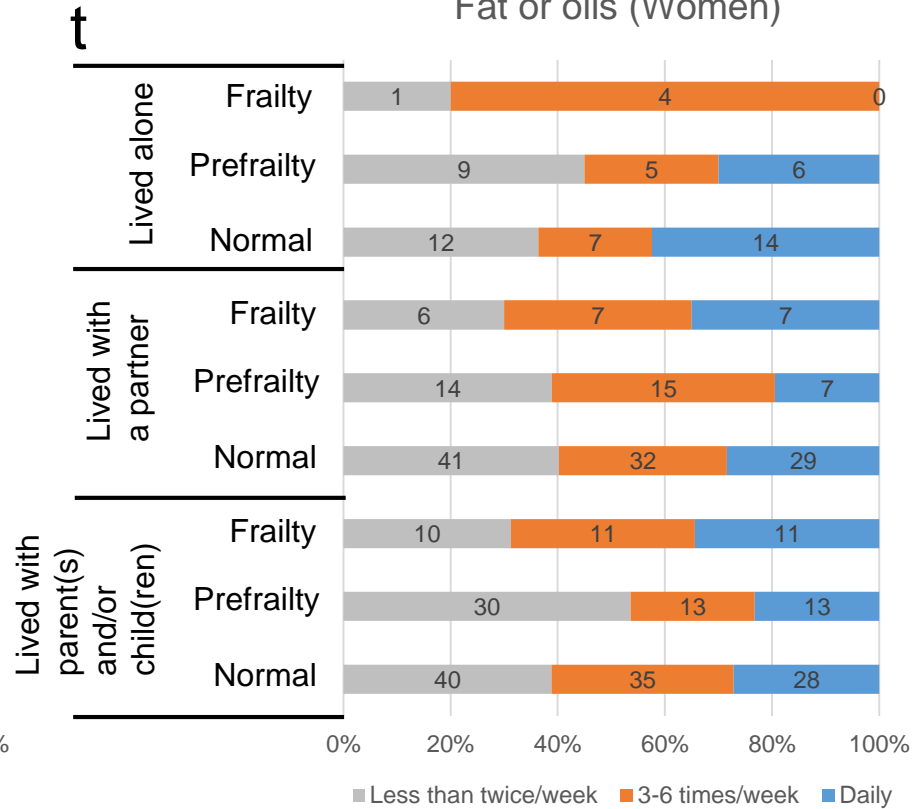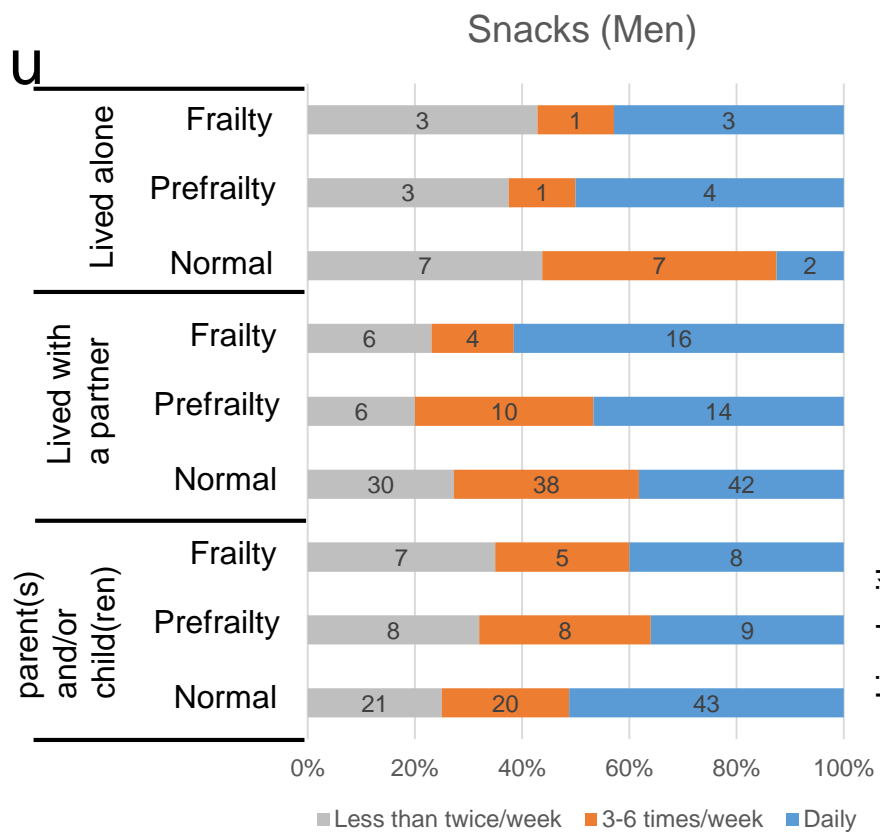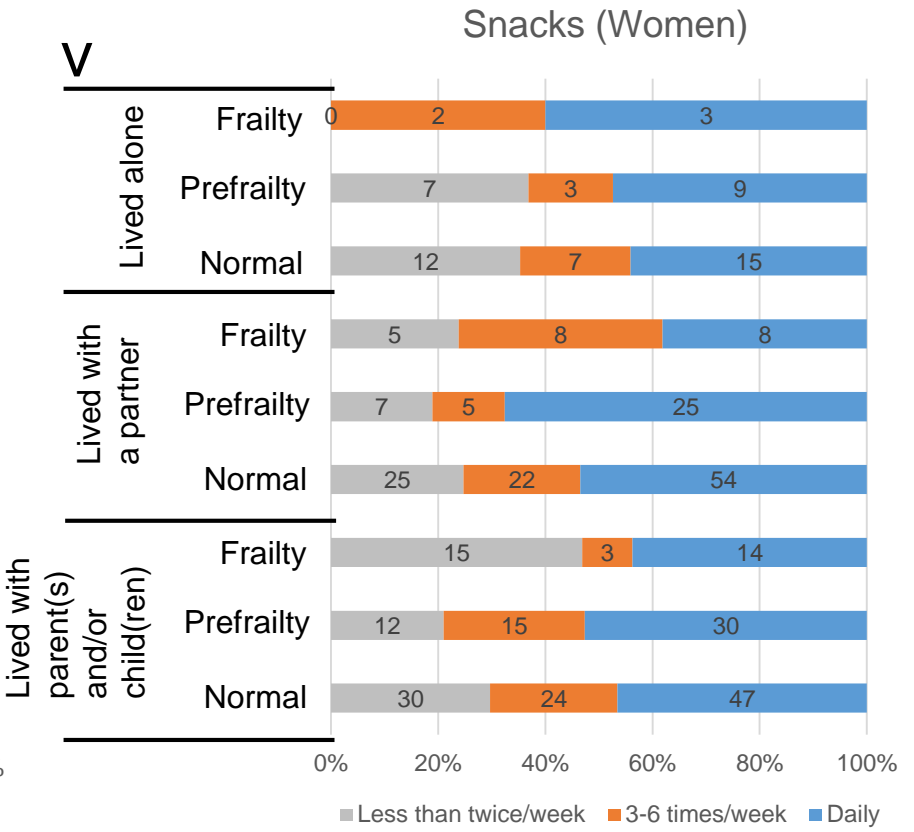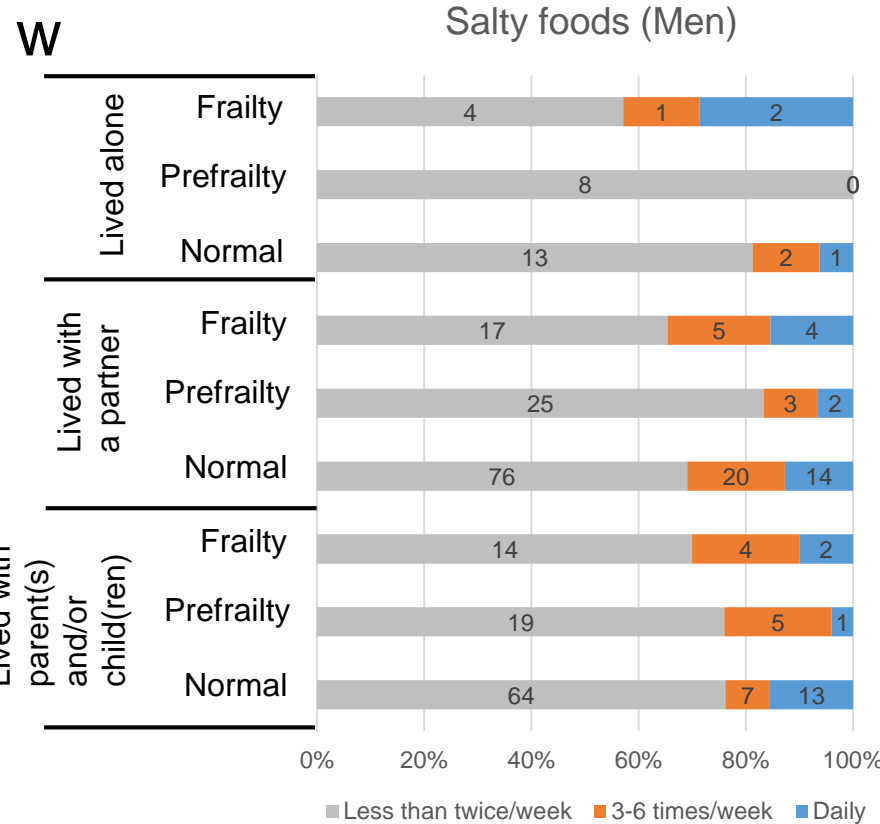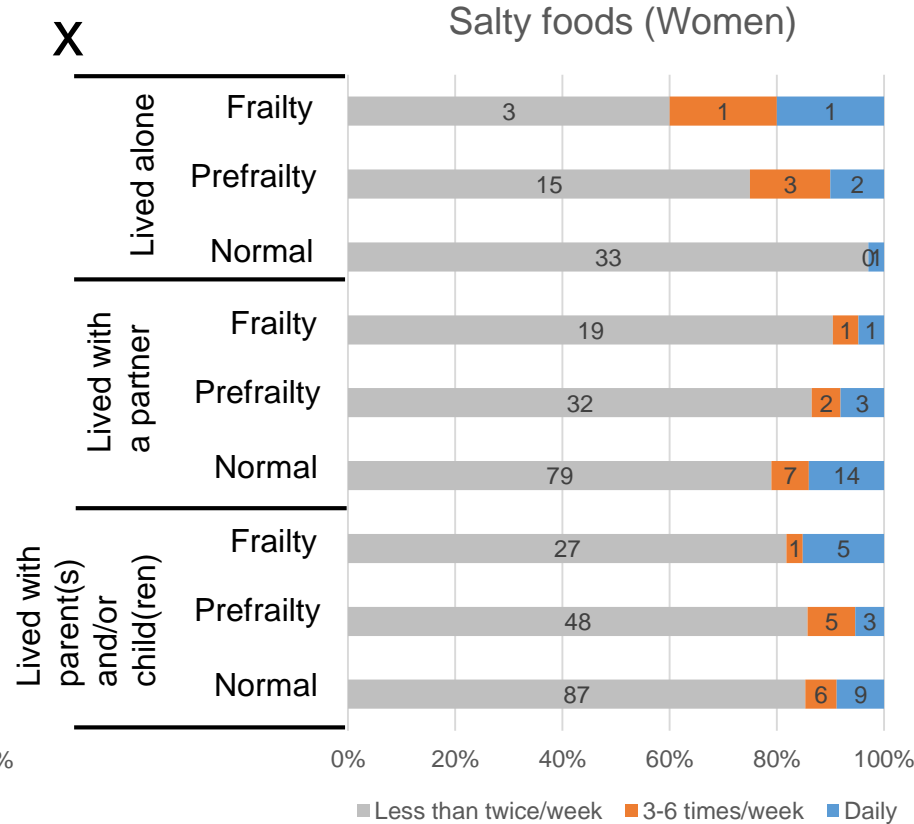

y

## Alcohol (Men)

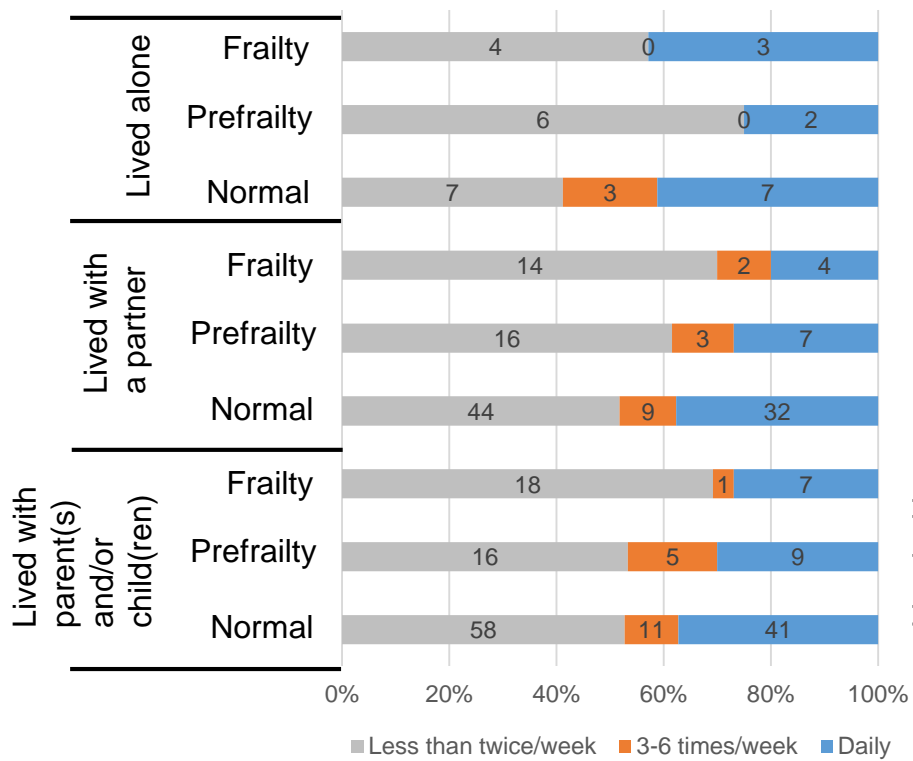

z

## Alcohol (Women)

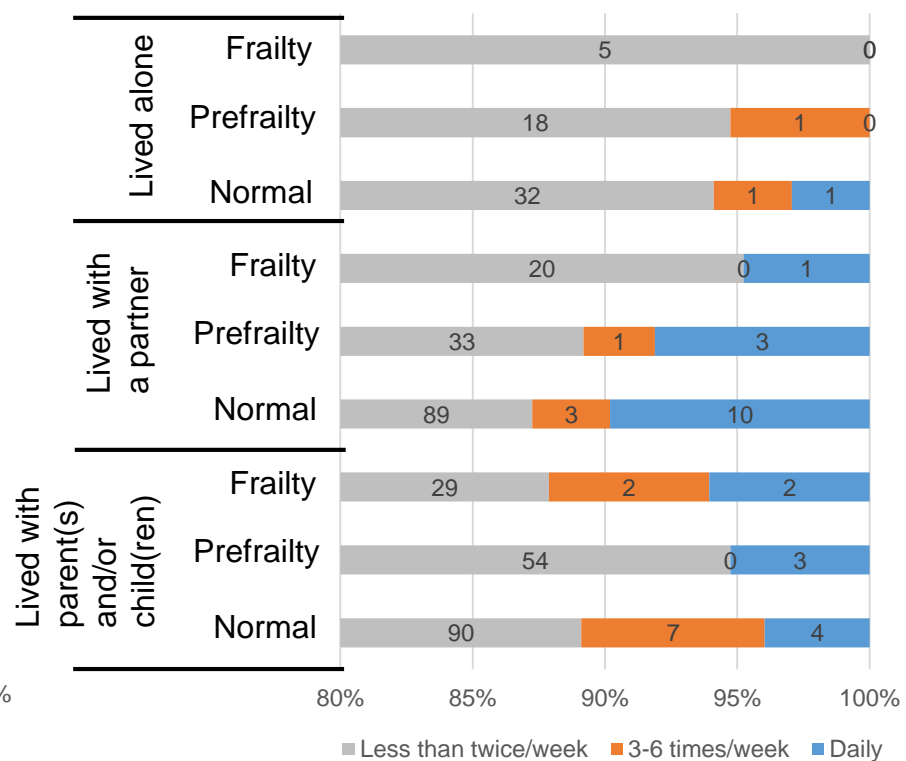

Supplement: 12877_2019_1229_MOESM1_ESM.pdf [file 12877_2019_1229_MOESM1_ESM.pdf]
